# Supplementary material for: Cluster Thinning and Vineyard Site Modulate the Metabolomic Profile of Ribolla Gialla Base and Sparkling Wines
Source: MDPI journal article supplement (doi:10.3390/metabo11050331), 2021-05-20
Supplement: s1 [file s1]

---

*Article*

# Cluster thinning and vineyard site modulate the metabolomic profile of Ribolla Gialla base and sparkling wines

Domen Škrab <sup>1,2</sup>, Paolo Sivilotti <sup>2,\*</sup>, Piergiorgio Comuzzo <sup>2</sup>, Sabrina Voce <sup>2</sup>, Francesco Degano <sup>3</sup>, Silvia Carlin <sup>1</sup>, Panagiotis Arapitsas <sup>1</sup>, Domenico Masuero <sup>1</sup> and Urška Vrhovšek <sup>1</sup>

<sup>1</sup> Department of Food Quality and Nutrition, Edmund Mach Foundation, Research and Innovation Centre, Via Edmund Mach 1, 38010 San Michele all'Adige, TN, Italy; domen.skrab@gmail.com (D.Š.); silvia.carlin@fmach.it (S.C.); panagiotis.arapitsas@fmach.it (P.A.); domenico.masuero@fmach.it (D.M.); urska.vrhovsek@fmach.it (U.V.)

<sup>2</sup> Department of Agricultural, Food, Environmental and Animal Sciences, University of Udine, Via delle Scienze 206, 33100 Udine, UD, Italy; piergiorgio.comuzzo@uniud.it (P.C.); sabrina.voce@uniud.it (S.V.)

<sup>3</sup> Consorzio "Friuli Colli Orientali e Ramandolo", Piazza 27 Maggio 11, 33040 Corno di Rosazzo, UD, Italy; assistenza\_tecnica@colliorientali.com (F.D.)

\* Correspondence: paolo.sivilotti@uniud.it (P.S.); Tel.: +39 0432 558628

## Supplementary material

---



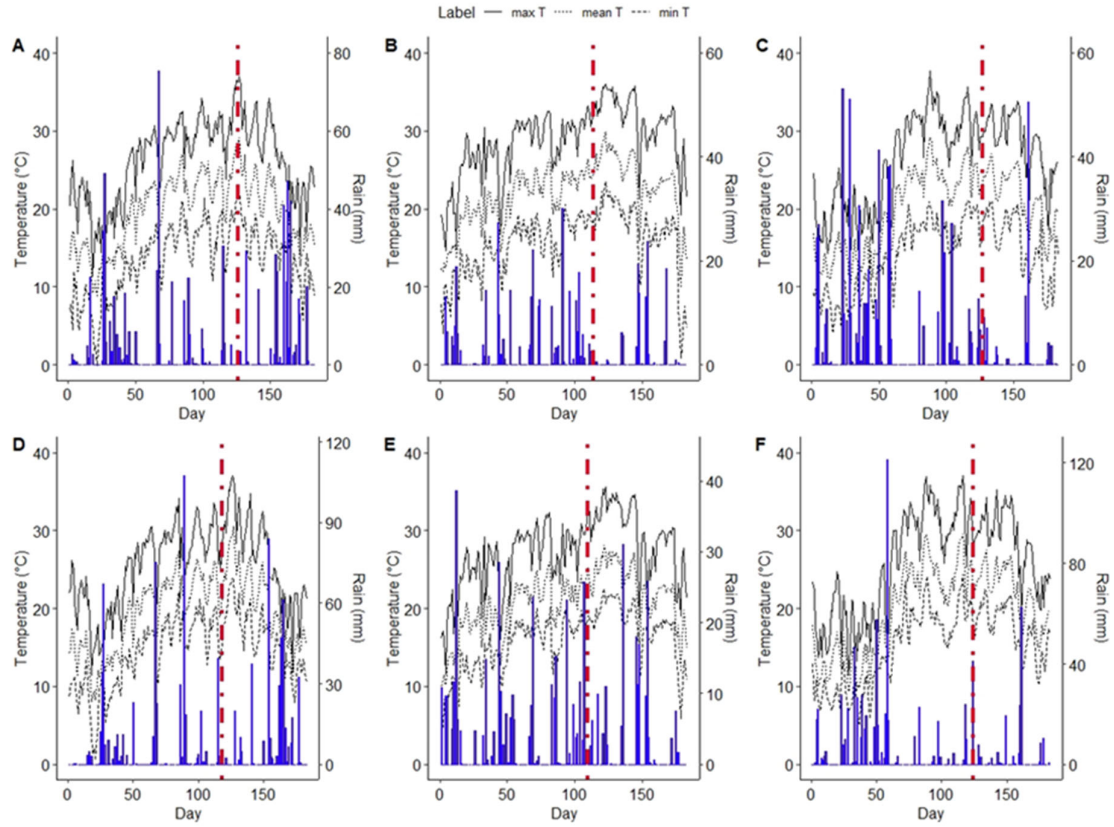

**Figure S1.** Meteorological data from 01 April to 30 September in the San Vito al Tagliamento—FG (A, B, C) and Cividale del Friuli—FCO (D, E, F) locations during 2017 (A, D), 2018 (B, E) and 2019 (C, F). Scattered lines represent min, mean and max temperatures while blue histograms represent rainfall. The dashed red line highlights the timing of cluster thinning in the different seasons.



**Table S1.** Impact of cluster thinning treatment, vineyard site and harvest season on the volatile profile of Ribolla Gialla base wines.

| Compound                  | Treatment (T) |        |                     | Site (S) |         |        | Year (Y) |                      |         | Sig. F | Y × T | S × T | Y × S | Y × S × T |
|---------------------------|---------------|--------|---------------------|----------|---------|--------|----------|----------------------|---------|--------|-------|-------|-------|-----------|
|                           | UNT           | CT     | Sig. F <sub>1</sub> | FG       | FCO     | Sig. F | 2017     | 2018                 | 2019    |        |       |       |       |           |
| Monoterpenes              | 18.87         | 19.26  | ns                  | 18.83    | 19.30   | ns     | 21.21a   | 19.44ab <sub>2</sub> | 16.54b  | ***    | ns    | ns    | *     | *         |
| β-myrcene                 | 0.31          | 0.33   | ns                  | 0.29     | 0.35    | ns     | 0.59a    | 0.20b                | 0.17b   | ***    | ns    | ns    | ns    | ns        |
| Limonene                  | 1.31          | 1.40   | ns                  | 1.24b    | 1.47a   | **     | 0.57c    | 1.37b                | 2.13a   | ***    | *     | ns    | ns    | *         |
| Linalool                  | 3.76b         | 4.26a  | *                   | 3.81b    | 4.22a   | *      | 4.58a    | 4.77a                | 2.69b   | ***    | *     | **    | *     | **        |
| Geraniol                  | 7.35          | 6.30   | ns                  | 6.68     | 6.96    | ns     | 7.88a    | 5.99b                | 6.59ab  | *      | ns    | ns    | ns    | ns        |
| Citronellol               | 3.70          | 3.81   | ns                  | 3.66     | 3.85    | ns     | 4.75a    | 3.54b                | 2.98b   | ***    | ns    | ns    | ***   | ns        |
| Nerol                     | 1.51          | 1.57   | ns                  | 1.52     | 1.56    | ns     | 1.53     | 1.65                 | 1.43    | ns     | **    | ns    | **    | **        |
| Terpinen-4-ol             | 0.24          | 0.28   | ns                  | 0.25     | 0.27    | ns     | 0.30a    | 0.30a                | 0.19b   | **     | ns    | ns    | ns    | ns        |
| α-Terpineol               | 0.79          | 1.31   | ns                  | 1.38     | 0.72    | ns     | 1.01     | 1.62                 | 0.51    | ns     | ns    | ns    | ns    | ns        |
| Norisoprenoids            | 13.29         | 12.88  | ns                  | 11.20b   | 14.97a  | ***    | 19.68a   | 11.76b               | 7.82c   | **     | ns    | ns    | ***   | ns        |
| Vitispirane               | 0.37          | 0.47   | ns                  | 0.44     | 0.40    | ns     | 0.70a    | 0.22b                | 0.34b   | ***    | ns    | ns    | ns    | ns        |
| TDN                       | 0.67          | 0.69   | ns                  | 0.66     | 0.70    | ns     | 0.64     | 0.75                 | 0.65    | ns     | ns    | ns    | ns    | ns        |
| β-Damascenone             | 11.95         | 11.46  | ns                  | 9.87b    | 13.54a  | ***    | 17.88a   | 10.53b               | 6.71c   | ***    | ns    | ns    | ***   | ns        |
| Actinidiol (isomer 1)     | 0.17          | 0.14   | ns                  | 0.12     | 0.20    | ns     | 0.23a    | 0.18a                | 0.06b   | *      | ns    | ns    | ns    | ns        |
| Actinidiol (isomer 2)     | 0.12          | 0.12   | ns                  | 0.11b    | 0.14a   | **     | 0.23a    | 0.08b                | 0.06c   | ***    | ns    | ns    | *     | ns        |
| Aldehydes                 | 116.94        | 131.80 | ns                  | 113.25b  | 135.49a | *      | 181.26a  | 98.29b               | 93.56b  | ***    | ns    | ns    | **    | ns        |
| Hexanal                   | 0.43          | 0.69   | ns                  | 0.45     | 0.68    | ns     | 1.02a    | 0.34b                | 0.33b   | ***    | ns    | ns    | **    | ns        |
| trans-2-Hexenal           | 84.88         | 89.28  | ns                  | 91.43    | 82.73   | ns     | 108.56a  | 71.83b               | 80.85ab | *      | ns    | ns    | ns    | ns        |
| Nonanal                   | 14.63         | 26.22  | ns                  | 6.41b    | 34.44a  | **     | 45.71a   | 10.51b               | 5.05b   | ***    | ns    | ns    | **    | ns        |
| Benzaldehyde              | 6.16          | 5.51   | ns                  | 4.66     | 7.00    | ns     | 10.99a   | 4.26b                | 2.25b   | **     | ns    | ns    | ns    | ns        |
| 3,4-Dimethyl benzaldehyde | 0.69          | 0.60   | ns                  | 0.36b    | 0.93a   | *      | 0.49b    | 1.17a                | 0.28b   | *      | ns    | ns    | *     | ns        |
| Acetaldehyde              | 9.71          | 9.01   | ns                  | 9.51     | 9.20    | ns     | 13.42a   | 9.97a                | 4.68b   | **     | ns    | ns    | ns    | ns        |
| Furfural                  | 0.44          | 0.49   | ns                  | 0.44     | 0.50    | ns     | 1.08a    | 0.21b                | 0.12b   | ***    | ns    | ns    | ns    | ns        |

(Continues on the next page).



Table S1. (Continued).

| Compound                  | Treatment (T) |          |                     | Site (S) |          |        | Year (Y) |          |          |        | Y × T | S × T | Y × S | Y × S × T |
|---------------------------|---------------|----------|---------------------|----------|----------|--------|----------|----------|----------|--------|-------|-------|-------|-----------|
|                           | UNT           | CT       | Sig. F <sup>1</sup> | FG       | FCO      | Sig. F | 2017     | 2018     | 2019     | Sig. F |       |       |       |           |
| Alcohols                  | 2388.08b      | 2591.65a | *                   | 2335.76b | 2643.97a | ***    | 1829.44b | 1382.90c | 4257.26a | ***    | ns    | ns    | ***   | ns        |
| n-Hexanol                 | 81.63         | 83.19    | ns                  | 63.33b   | 101.49a  | ***    | 157.24a  | 41.29b   | 48.70b   | ***    | ns    | ns    | ***   | ns        |
| <i>trans</i> -3-Hexenol   | 1.55          | 1.61     | ns                  | 1.14b    | 2.02a    | ***    | 2.59a    | 1.06b    | 1.09b    | ***    | ns    | ns    | ***   | ns        |
| 1-Octanol                 | 10.27         | 9.46     | ns                  | 9.65     | 10.08    | ns     | 9.25     | 11.39    | 8.96     | ns     | ns    | ns    | ns    | ns        |
| Isobutanol                | 102.81        | 98.72    | ns                  | 90.30b   | 111.22a  | *      | 85.49b   | 118.73a  | 98.06b   | **     | ns    | ns    | *     | *         |
| Methionol                 | 4.78          | 5.12     | ns                  | 4.36b    | 5.54a    | ***    | 6.62a    | 4.10b    | 4.13b    | ***    | ns    | ns    | ***   | ns        |
| Isoamyl alcohol           | 1462.30b      | 1595.95a | **                  | 1431.83b | 1626.42a | **     | 658.32b  | 645.54b  | 3283.53a | ***    | **    | ns    | **    | ns        |
| 3-Methyl-1-pentanol       | 7.10          | 8.36     | ns                  | 6.50b    | 8.96a    | ***    | 7.15     | 8.06     | 7.99     | ns     | ns    | ns    | ***   | ns        |
| 2,3-Butanediol (isomer 1) | 16.85         | 17.59    | ns                  | 18.64    | 15.80    | ns     | 21.42a   | 13.12b   | 17.13b   | **     | ns    | ns    | ns    | ns        |
| 2,3-Butanediol (isomer 2) | 4.35          | 5.15     | ns                  | 5.26     | 4.24     | ns     | 5.71     | 4.45     | 4.09     | ns     | ns    | ns    | ns    | ns        |
| <i>cis</i> -3-Hexenol     | 696.46b       | 766.49a  | *                   | 704.75   | 758.20   | ns     | 875.65a  | 535.17c  | 783.60b  | ***    | ns    | ns    | ***   | ns        |
| Esters                    | 2286.64       | 2414.24  | ns                  | 2363.73  | 2337.15  | ns     | 4111.28a | 1809.03b | 1131.00c | ***    | ns    | ns    | ns    | ns        |
| Ethyl acetate             | 93.05b        | 112.05a  | ns                  | 86.36b   | 118.74a  | **     | 127.85a  | 67.37b   | 112.44a  | ***    | ns    | ns    | ns    | ns        |
| Ethyl butyrate            | 27.66         | 30.36    | ns                  | 28.01    | 30.01    | ns     | 32.00    | 26.89    | 28.13    | ns     | ns    | ns    | ns    | ns        |
| Isopentyl acetate         | 208.71        | 226.90   | ns                  | 212.83   | 222.78   | ns     | 310.17a  | 151.91b  | 191.33b  | ***    | ns    | ns    | ns    | ns        |
| Hexyl acetate             | 50.03         | 47.89    | ns                  | 41.03b   | 56.89a   | *      | 114.19a  | 13.12b   | 19.58b   | ***    | ns    | ns    | ***   | ns        |
| Methyl caproate           | 0.44          | 0.41     | ns                  | 0.45     | 0.40     | ns     | 0.36     | 0.43     | 0.49     | ns     | ns    | ns    | ns    | ns        |
| Ethyl hexanoate           | 705.59        | 733.38   | ns                  | 713.18   | 725.79   | ns     | 974.87a  | 726.63b  | 456.96c  | ***    | ns    | ns    | ns    | ns        |
| Ethyl lactate             | 3.24          | 3.50     | ns                  | 3.33     | 3.40     | ns     | 4.70a    | 2.49b    | 2.92b    | ***    | ns    | ns    | ***   | ns        |
| Methyl octanoate          | 1.26          | 1.29     | ns                  | 1.21     | 1.34     | ns     | 2.15a    | 1.04b    | 0.64b    | ***    | ns    | ns    | ns    | ns        |
| Ethyl octanoate           | 687.39        | 743.26   | ns                  | 679.43   | 751.23   | ns     | 1641.87a | 306.94b  | 197.17b  | ***    | ns    | ns    | ns    | ns        |
| Isoamyl lactate           | 0.65          | 0.73     | ns                  | 0.56b    | 0.82a    | ***    | 0.52b    | 0.83a    | 0.72a    | ***    | ns    | ns    | ***   | ns        |
| Methyl decanoate          | 0.12          | 0.12     | ns                  | 0.11     | 0.13     | ns     | 0.26a    | 0.04b    | 0.06b    | ***    | ns    | ns    | ns    | ns        |

(Continues on the next page).



Table S1. (Continued).

| Compound                      | Treatment (T) |         |                     | Site (S) |         |        | Year (Y) |          |          |        | Y × T | S × T | Y × S | Y × S × T |
|-------------------------------|---------------|---------|---------------------|----------|---------|--------|----------|----------|----------|--------|-------|-------|-------|-----------|
|                               | UNT           | CT      | Sig. F <sup>1</sup> | FG       | FCO     | Sig. F | 2017     | 2018     | 2019     | Sig. F |       |       |       |           |
| Ethyl decanoate               | 180.36        | 179.37  | ns                  | 184.99   | 174.73  | ns     | 387.03a  | 99.53b   | 53.03b   | ***    | ns    | ns    | ns    | ns        |
| Isoamyl octanoate             | 3.23          | 3.65    | ns                  | 2.77b    | 4.10a   | *      | 5.85a    | 3.21b    | 1.25c    | ***    | ns    | ns    | ns    | ns        |
| Methyl ethyl succinate        | 128.68        | 118.34  | ns                  | 153.74a  | 93.28b  | **     | 102.55b  | 267.94a  | 0.04c    | ***    | ns    | ns    | **    | ns        |
| Diethyl succinate             | 60.91         | 64.43   | ns                  | 70.35a   | 54.99b  | *      | 156.40a  | 28.99b   | 2.63c    | ***    | ns    | ns    | ns    | ns        |
| Ethyl 9-decanoate             | 56.68         | 61.14   | ns                  | 101.15a  | 16.67b  | ***    | 104.12a  | 58.89b   | 13.72c   | ***    | ns    | ns    | **    | ns        |
| Ethyl-2-OH-4-methylpentanoate | 1.39          | 1.28    | ns                  | 1.20b    | 1.48a   | **     | 1.77a    | 1.48b    | 0.75c    | ***    | ns    | ns    | ***   | ns        |
| 2-Phenylethyl acetate         | 58.91         | 61.97   | ns                  | 64.23    | 56.65   | ns     | 108.44a  | 38.28b   | 34.60b   | ***    | ns    | ns    | ns    | ns        |
| Ethyl hydrogen succinate      | 3.94          | 4.40    | ns                  | 3.53b    | 4.80a   | *      | 5.87a    | 6.18a    | 0.44b    | ***    | ns    | ns    | ***   | ns        |
| Methyl salicylate             | 9.21          | 5.66    | ns                  | 9.00     | 5.87    | ns     | 19.98a   | 1.88b    | 0.46b    | **     | ns    | ns    | ns    | ns        |
| Ethyl hydroxybutanoate        | 5.20          | 6.26    | ns                  | 6.28     | 5.18    | ns     | 10.34a   | 4.98b    | 1.87c    | ***    | ns    | ns    | ns    | ns        |
| Acids                         | 1702.88       | 1551.69 | ns                  | 1489.00  | 1765.56 | ns     | 2533.89a | 732.68 c | 1615.27b | ***    | ns    | ns    | ns    | ns        |
| Acetic acid                   | 36.27         | 36.28   | ns                  | 32.45    | 40.10   | ns     | 16.89b   | 46.92a   | 45.02a   | ***    | ns    | ns    | *     | *         |
| Butyric acid                  | 5.38          | 5.56    | ns                  | 5.06     | 5.88    | ns     | 5.28     | 6.28     | 4.85     | ns     | ns    | ns    | ns    | *         |
| 3-Methylbutyric acid          | 18.15         | 19.16   | ns                  | 17.03b   | 20.27a  | *      | 23.79a   | 19.80b   | 12.37c   | ***    | ns    | ns    | *     | ns        |
| Hexanoic acid                 | 106.63        | 105.41  | ns                  | 102.06   | 109.98  | ns     | 154.54a  | 65.16c   | 98.36b   | ***    | ns    | ns    | *     | ns        |
| Octanoic acid                 | 462.97        | 453.73  | ns                  | 436.30   | 480.41  | ns     | 729.19a  | 230.62c  | 415.25b  | ***    | ns    | ns    | ns    | ns        |
| Nonanoic acid                 | 32.07         | 25.98   | ns                  | 28.99    | 29.07   | ns     | 6.24b    | 6.34b    | 74.51a   | ***    | ns    | ns    | ns    | ns        |
| Decanoic acid                 | 1016.65       | 882.67  | ns                  | 842.94   | 1056.38 | ns     | 1557.00a | 346.49c  | 945.50b  | ***    | ns    | ns    | ns    | ns        |
| Benzoic acid                  | 6.75          | 5.99    | ns                  | 5.02     | 7.72    | ns     | 15.44a   | 2.62b    | 1.06b    | *      | ns    | ns    | ns    | ns        |
| Dodecanoic acid               | 18.00         | 16.90   | ns                  | 19.15    | 15.75   | ns     | 25.53a   | 8.46b    | 18.36ab  | *      | ns    | ns    | *     | *         |
| Ketones                       | 17.75         | 19.38   | ns                  | 18.24    | 18.89   | ns     | 20.08    | 15.45    | 20.16    | ns     | ns    | ns    | ns    | ns        |
| 2-Methylthiolan-3-one         | 2.23          | 2.42    | ns                  | 2.81a    | 1.84b   | *      | 1.99     | 2.79     | 2.20     | ns     | ns    | ns    | ns    | ns        |
| Isophorone                    | 15.52         | 16.96   | ns                  | 15.43    | 17.05   | ns     | 18.1     | 12.67    | 17.96    | ns     | ns    | ns    | ns    | ns        |

(Table footer continues the next page).



---

<sup>1</sup> Data were analyzed by three-ways ANOVA (ns, not significant; \*,  $p < 0.05$ ; \*\*,  $p < 0.01$ ; \*\*\*,  $p < 0.001$ ), and when differences were significant, the means were separated using Student Newman Keuls test ( $p < 0.05$ ). <sup>2</sup> Different letters (a, b, c) identify significantly different means. UNT, untreated control; CT, cluster thinning; FG, Friuli Grave; FCO, Friuli Colli Orientali. All the concentrations are expressed in  $\mu\text{g/L}$  as IS 2-octanol.



**Table S2.** Impact of cluster thinning treatment, vineyard site and harvest season on the volatile profile of Ribolla Gialla sparkling wines.

| Compound                  | Treatment (T)      |         |                     | Site (S) |        |        | Year (Y) |         |         |        | Y × T | S × T | Y × S | Y × S × T |
|---------------------------|--------------------|---------|---------------------|----------|--------|--------|----------|---------|---------|--------|-------|-------|-------|-----------|
|                           | UNT                | CT      | Sig. F <sup>1</sup> | FG       | FCO    | Sig. F | 2017     | 2018    | 2019    | Sig. F |       |       |       |           |
| Monoterpenes              | 24.54              | 25.54   | ns                  | 25.57    | 24.51  | ns     | 21.44b   | 22.21b  | 31.48a  | ***    | ns    | ***   | ns    | ns        |
| β-Myrcene                 | 0.70b <sup>2</sup> | 0.80a   | **                  | 0.74     | 0.75   | ns     | 0.70b    | 0.70b   | 0.83a   | **     | ns    | ns    | ns    | ns        |
| Limonene                  | 2.32               | 2.45    | ns                  | 2.50     | 2.27   | ns     | 2.36     | 2.40    | 2.41    | ns     | ns    | ns    | ns    | ns        |
| Linalool                  | 4.55b              | 4.95a   | *                   | 4.59b    | 4.90a  | *      | 4.49b    | 5.11a   | 4.64b   | ns     | ns    | *     | ns    | ns        |
| Geraniol                  | 7.85               | 7.27    | ns                  | 7.33     | 7.80   | ns     | 8.18     | 7.13    | 7.38    | ns     | ns    | *     | ns    | ns        |
| Citronellol               | 1.41b              | 1.60a   | *                   | 1.37b    | 1.64a  | **     | 1.44b    | 1.19c   | 1.88a   | ***    | ns    | **    | ns    | **        |
| Nerol                     | 3.04               | 2.96    | ns                  | 2.80b    | 3.20a  | ***    | 2.34c    | 2.66b   | 4.00a   | ***    | ns    | ***   | *     | **        |
| Terpinen-4-ol             | 0.54               | 0.55    | ns                  | 0.52     | 0.57   | ns     | 0.45b    | 0.61a   | 0.57a   | **     | ns    | ns    | ns    | ns        |
| α-Terpineol               | 4.13               | 4.97    | ns                  | 5.73a    | 3.38b  | ***    | 1.47b    | 2.42b   | 9.77a   | ***    | ns    | ***   | ns    | ns        |
| Norisoprenoids            | 16.17              | 16.63   | ns                  | 15.16b   | 17.63a | ***    | 18.00a   | 11.92b  | 19.28a  | ***    | ns    | ***   | ns    | *         |
| Vitispirane               | 0.62               | 0.79    | ns                  | 0.76     | 0.66   | ns     | 0.81     | 0.60    | 0.72    | ns     | ns    | ns    | ns    | ns        |
| TDN                       | 0.99               | 1.08    | ns                  | 0.92b    | 1.15a  | **     | 0.95b    | 0.40c   | 1.75a   | ***    | ns    | ns    | ns    | ns        |
| β-Damascenone             | 13.62              | 13.88   | ns                  | 12.57b   | 14.93a | ***    | 15.21a   | 10.00b  | 16.05a  | ***    | ns    | ***   | **    | **        |
| Actinidiol (isomer 1)     | 0.40               | 0.37    | ns                  | 0.39     | 0.39   | ns     | 0.44a    | 0.40b   | 0.32c   | ***    | ns    | ***   | ns    | ns        |
| Actinidiol (isomer 2)     | 0.53               | 0.50    | ns                  | 0.52     | 0.51   | ns     | 0.59a    | 0.53b   | 0.43c   | ***    | ns    | ***   | ns    | ns        |
| Aldehydes                 | 417.83b            | 474.89a | *                   | 423.12   | 469.60 | ns     | 499.58a  | 360.28b | 479.23a | ***    | ns    | ns    | ns    | ns        |
| Hexanal                   | 0.09               | 0.07    | ns                  | 0.08     | 0.09   | ns     | 0.12a    | 0.05c   | 0.08b   | ***    | ns    | ns    | ns    | ns        |
| trans-2-Hexenal           | 388.74b            | 441.41a | *                   | 394.47   | 435.68 | ns     | 464.22a  | 334.23b | 446.77a | ***    | ns    | ns    | ns    | ns        |
| Nonanal                   | 3.24               | 2.92    | ns                  | 3.01     | 3.15   | ns     | 2.86b    | 2.49b   | 3.89a   | *      | ns    | *     | ns    | ns        |
| Benzaldehyde              | 6.69               | 7.00    | ns                  | 6.42     | 7.27   | ns     | 8.75a    | 5.28c   | 6.51b   | ***    | ns    | ns    | ns    | ns        |
| 3,4-Dimethyl benzaldehyde | 1.43               | 1.52    | ns                  | 1.43     | 1.52   | ns     | 1.69a    | 1.00b   | 1.73a   | ***    | ns    | ns    | ns    | ns        |
| Acetaldehyde              | 16.18b             | 20.48a  | **                  | 16.14b   | 20.52a | **     | 20.41    | 16.14   | 18.44   | ns     | ns    | ns    | ns    | ns        |
| Furfural                  | 1.47               | 1.49    | ns                  | 1.59     | 1.38   | ns     | 1.53a    | 1.09b   | 1.82a   | ***    | ns    | ns    | ns    | **        |

(Continues on the next page)



Table S2. (Continued).

| Compound                  | Treatment (T) |          |                     | Site (S) |         |        | Year (Y) |          |          |        | Y × T | S × T | Y × S | Y × S × T |
|---------------------------|---------------|----------|---------------------|----------|---------|--------|----------|----------|----------|--------|-------|-------|-------|-----------|
|                           | UNT           | CT       | Sig. F <sup>1</sup> | FG       | FCO     | Sig. F | 2017     | 2018     | 2019     | Sig. F |       |       |       |           |
| Alcohols                  | 3678.56b      | 4086.47a | **                  | 3791.62  | 3973.41 | ns     | 3975.01a | 3538.87b | 4133.67a | **     | ns    | ns    | ns    | ns        |
| n-Hexanol                 | 75.74         | 79.19    | ns                  | 61.63b   | 93.30a  | ***    | 144.07a  | 30.64c   | 57.68b   | ***    | ns    | ***   | ns    | ns        |
| <i>trans</i> -3-Hexenol   | 1.76          | 1.88     | ns                  | 1.36b    | 2.28a   | ***    | 3.04a    | 1.02c    | 1.40b    | ***    | ns    | ***   | ns    | ns        |
| 1-octanol                 | 11.20         | 10.44    | ns                  | 10.74    | 10.90   | ns     | 10.99    | 10.39    | 11.09    | ns     | **    | **    | ns    | ns        |
| Iso-butanol               | 106.05b       | 119.85a  | *                   | 109.58   | 116.32  | ns     | 110.03b  | 95.94b   | 132.87a  | ***    | ns    | ns    | ns    | **        |
| Methionol                 | 2.31          | 2.85     | ns                  | 2.76     | 2.40    | ns     | 2.24     | 2.84     | 2.66     | ns     | *     | ns    | ns    | ns        |
| Isoamyl alcohol           | 2749.83b      | 3073.61a | **                  | 2845.52  | 2977.92 | ns     | 2893.35b | 2669.83b | 3171.99a | **     | ns    | ns    | ns    | ns        |
| 3-Methyl-1-pentanol       | 9.13b         | 10.86a   | **                  | 10.03    | 9.96    | ns     | 8.90b    | 10.59a   | 10.50a   | *      | ns    | ns    | ns    | ns        |
| 2,3-Butanediol (isomer 1) | 5.55a         | 2.44b    | *                   | 3.32     | 4.66    | ns     | 10.39a   | 0.59b    | 1.00b    | ***    | ns    | ns    | *     | ns        |
| 2,3-Butanediol (isomer 2) | 2.22a         | 1.23b    | *                   | 1.58     | 1.87    | ns     | 3.87a    | 0.46b    | 0.85b    | ***    | ns    | ns    | *     | ns        |
| <i>cis</i> -3-Hexenol     | 0.29b         | 0.51a    | *                   | 0.47     | 0.32    | ns     | 0.45     | 0.38     | 0.36     | ns     | ns    | ns    | ns    | ns        |
| <i>trans</i> -2-Hexenol   | 1.04          | 1.49     | ns                  | 1.05     | 1.48    | ns     | 1.39     | 1.13     | 1.27     | ns     | ns    | ns    | ns    | ns        |
| 2-Phenylethanol           | 714.77b       | 784.12a  | **                  | 745.10   | 753.79  | ns     | 788.14   | 716.56   | 743.64   | ns     | ns    | ns    | ns    | ns        |
| Esters                    | 2667.36       | 2978.17  | ns                  | 2912.35  | 2733.18 | ns     | 2484.72b | 2539.83b | 3443.76a | ***    | ns    | ns    | ns    | ns        |
| Ethyl acetate             | 299.39        | 347.16   | ns                  | 298.65   | 347.9   | ns     | 307.33b  | 237.68c  | 424.81a  | ***    | ns    | ns    | ns    | ns        |
| Ethyl butyrate            | 42.62         | 46.24    | ns                  | 46.86    | 42.00   | ns     | 36.59b   | 41.44b   | 55.26a   | ***    | ns    | ns    | ns    | ns        |
| Isopentyl acetate         | 189.33        | 193.35   | ns                  | 205.63   | 177.05  | ns     | 138.94b  | 189.43c  | 245.65a  | ***    | ns    | ns    | ns    | ns        |
| Hexyl acetate             | 22.09         | 21.81    | ns                  | 25.96a   | 17.93b  | *      | 20.84ab  | 16.46b   | 28.53a   | *      | ns    | ***   | ns    | ns        |
| Methyl caproate           | 0.58          | 0.63     | ns                  | 0.60     | 0.61    | ns     | 0.48b    | 0.57b    | 0.76a    | ***    | ns    | ns    | ns    | ns        |
| Ethyl hexanoate           | 947.62        | 1044.37  | ns                  | 1020.51  | 971.48  | ns     | 1000.85  | 940.15   | 1046.99  | ns     | ns    | ns    | ns    | ns        |
| Ethyl lactate             | 15.40b        | 17.84a   | **                  | 17.04    | 16.20   | ns     | 18.74a   | 14.52c   | 16.60b   | ***    | ns    | **    | ns    | ns        |
| Methyl octanoate          | 3.06          | 3.17     | ns                  | 3.18     | 3.05    | ns     | 2.41b    | 3.26a    | 3.68a    | ***    | ns    | ns    | ns    | ns        |

(Continues on the next page)

Table S2. (Continued).



| Compound                      | Treatment (T) |         |                     | Site (S) |         |        | Year (Y) |          |           |        | Y×T | S×T | Y×S | Y×S×T |
|-------------------------------|---------------|---------|---------------------|----------|---------|--------|----------|----------|-----------|--------|-----|-----|-----|-------|
|                               | UNT           | CT      | Sig. F <sup>1</sup> | FG       | FCO     | Sig. F | 2017     | 2018     | 2019      | Sig. F |     |     |     |       |
| Ethyl octanoate               | 587.02        | 659.98  | ns                  | 627.28   | 619.72  | ns     | 462.69c  | 627.70b  | 780.11a   | ***    | ns  | ns  | ns  | ns    |
| Isoamyl lactate               | 2.31          | 2.40    | ns                  | 2.31     | 2.40    | ns     | 2.46a    | 2.12b    | 2.49a     | **     | ns  | *   | ns  | ns    |
| Methyl decanoate              | 0.28          | 0.31    | ns                  | 0.28     | 0.30    | ns     | 0.23b    | 0.22b    | 0.43a     | ***    | ns  | ns  | ns  | ns    |
| Ethyl decanoate               | 168.27        | 188.86  | ns                  | 183.12   | 174.01  | ns     | 27.45c   | 168.00b  | 340.25a   | ***    | ns  | ns  | ns  | ns    |
| Isoamyl octanoate             | 2.47          | 2.59    | ns                  | 2.55     | 2.51    | ns     | 1.91b    | 2.54a    | 3.14a     | **     | ns  | ns  | ns  | ns    |
| Methyl ethyl succinate        | 106.51        | 121.36  | ns                  | 117.71   | 110.17  | ns     | 109.76b  | 81.40c   | 150.65a   | ***    | ns  | ns  | ns  | ns    |
| Diethyl succinate             | 89.89b        | 102.10a | **                  | 96.81    | 95.18   | ns     | 144.32a  | 98.95b   | 44.71c    | ***    | ns  | ns  | ns  | ns    |
| Methyl decanoate              | 0.28          | 0.31    | ns                  | 0.28     | 0.30    | ns     | 0.23b    | 0.22b    | 0.43a     | ***    | ns  | ns  | ns  | ns    |
| Ethyl decanoate               | 168.27        | 188.86  | ns                  | 183.12   | 174.01  | ns     | 27.45c   | 168.00b  | 340.25a   | ***    | ns  | ns  | ns  | ns    |
| Isoamyl octanoate             | 2.47          | 2.59    | ns                  | 2.55     | 2.51    | ns     | 1.91b    | 2.54a    | 3.14a     | **     | ns  | ns  | ns  | ns    |
| Methyl ethyl succinate        | 106.51        | 121.36  | ns                  | 117.71   | 110.17  | ns     | 109.76b  | 81.40c   | 150.65a   | ***    | ns  | ns  | ns  | ns    |
| Diethyl succinate             | 89.89b        | 102.10a | **                  | 96.81    | 95.18   | ns     | 144.32a  | 98.95b   | 44.71c    | ***    | ns  | ns  | ns  | ns    |
| Ethyl 9-decanoate             | 118.88b       | 148.53a | **                  | 185.20a  | 82.21b  | ***    | 151.24b  | 15.40c   | 234.47a   | ***    | ns  | *** | ns  | ns    |
| Ethyl-2-OH-4-methylpentanoate | 3.21          | 2.94    | ns                  | 3.05     | 3.10    | ns     | 2.62b    | 3.68a    | 2.92b     | ***    | ns  | ns  | ns  | ns    |
| 2-Phenylethyl acetate         | 43.50         | 47.62   | ns                  | 48.41    | 42.71   | ns     | 37.47b   | 51.25a   | 47.96a    | **     | ns  | ns  | ns  | ns    |
| Ethyl hydrogen succinate      | 16.76         | 19.68   | ns                  | 19.74    | 16.7    | ns     | 12.69b   | 35.27a   | 6.69b     | ***    | ns  | ns  | ns  | ns    |
| Methyl salicylate             | 5.38          | 3.91    | ns                  | 4.65     | 4.64    | ns     | 3.58b    | 7.58a    | 2.79b     | **     | ns  | ns  | ns  | ns    |
| Ethyl hydroxybutanoate        | 2.01b         | 2.51a   | *                   | 2.06     | 2.46    | ns     | 1.14b    | 1.62b    | 4.02a     | ***    | ns  | ns  | ns  | *     |
| Ethyl dodecanoate             | 0.78          | 0.83    | ns                  | 0.76     | 0.85    | ns     | 0.97a    | 0.58b    | 0.86a     | ***    | ns  | *   | ns  | ns    |
| Isobutyl acetate              | 1.02          | 1.69    | ns                  | 1.27     | 1.43    | ns     | 1.56     | 1.15     | 1.34      | ns     | *   | ns  | ns  | ns    |
| Acids                         | 2280.49       | 2267.72 | ns                  | 2296.39  | 2251.83 | ns     | 1840.70b | 2718.65a | 2262.97ab | **     | ns  | ns  | ns  | ns    |
| Acetic acid                   | 33.76b        | 41.79a  | *                   | 33.27b   | 42.28a  | **     | 21.45c   | 36.02b   | 55.85a    | ***    | ns  | *   | *   | ns    |
| Butyric acid                  | 7.30          | 7.17    | ns                  | 7.45     | 7.01    | ns     | 6.08c    | 7.34b    | 8.29a     | ***    | ns  | ns  | ns  | ns    |

(Continues on the next page)

Table S2. (Continued)



| Compound              | Treatment (T) |         |                     | Site (S) |         |        | Year (Y) |          |          |        | Y×T | S×T | Y×S | Y×S×T |
|-----------------------|---------------|---------|---------------------|----------|---------|--------|----------|----------|----------|--------|-----|-----|-----|-------|
|                       | UNT           | CT      | Sig. F <sup>1</sup> | FG       | FCO     | Sig. F | 2017     | 2018     | 2019     | Sig. F |     |     |     |       |
| Butyric acid          | 7.30          | 7.17    | ns                  | 7.45     | 7.01    | ns     | 6.08c    | 7.34b    | 8.29a    | ***    | ns  | ns  | ns  | ns    |
| Hexanoic acid         | 120.51        | 124.46  | ns                  | 121.49   | 123.47  | ns     | 124.04   | 115.83   | 127.59   | ns     | ns  | ns  | ns  | ns    |
| Octanoic acid         | 455.15        | 466.16  | ns                  | 460.77   | 460.55  | ns     | 388.98b  | 443.06b  | 549.94a  | ***    | ns  | ns  | ns  | ns    |
| Nonanoic acid         | 49.37         | 43.05   | ns                  | 45.50    | 46.92   | ns     | 61.10a   | 20.42b   | 57.11a   | **     | *   | ns  | ns  | *     |
| Decanoic acid         | 1548.92       | 1517.93 | ns                  | 1558.47  | 1508.38 | ns     | 1185.85b | 2005.13a | 1409.30b | **     | ns  | ns  | ns  | ns    |
| Benzoic acid          | 2.63          | 3.22    | ns                  | 3.00a    | 2.85b   | *      | 2.84     | 2.99     | 2.94     | ns     | ns  | ns  | ns  | ns    |
| Dodecanoic acid       | 43.63         | 44.51   | ns                  | 47.19    | 40.95   | ns     | 30.19b   | 68.46a   | 33.55b   | ***    | ns  | ns  | ns  | ns    |
| Ketones               | 139.98        | 147.75  | ns                  | 145.05   | 142.68  | ns     | 159.06a  | 134.54b  | 137.98b  | **     | ns  | ns  | ns  | ns    |
| 2-Methylthiolan-3-one | 2.30          | 2.71    | ns                  | 3.21a    | 1.80b   | ***    | 0.83c    | 3.79a    | 2.89b    | ***    | ns  | *** | ns  | ns    |
| Isophorone            | 137.68        | 145.03  | ns                  | 141.84   | 140.88  | ns     | 158.24a  | 130.75b  | 135.09b  | **     | ns  | ns  | ns  | ns    |

<sup>1</sup> Data were analyzed by three-ways ANOVA (ns, not significant; \*,  $p < 0.05$ ; \*\*,  $p < 0.01$ ; \*\*\*,  $p < 0.001$ ), and when differences were significant, the means were separated using Student Newman Keuls test ( $p < 0.05$ ). <sup>2</sup> Different letters (a, b, c) identify significantly different means. UNT, untreated control; CT, cluster thinning; FG, Friuli Grave; FCO, Friuli Colli Orientali. All the concentrations are expressed in µg/L as IS 2-octanol, except *cis*-3-hexenol, *trans*-2-hexenol, and isobutyl acetate that are reported in ng/L.



**Table S3.** Impact of cluster thinning treatment, vineyard site and harvest season on the lipid profile of Ribolla Gialla base wines.

| Compound                               | Treatment (T) |        |                     | Site (S) |        |        | Year (Y)           |         |         |        | Y×T | S×T | Y×S | Y×S×T |
|----------------------------------------|---------------|--------|---------------------|----------|--------|--------|--------------------|---------|---------|--------|-----|-----|-----|-------|
|                                        | UNT           | CT     | Sig. F <sup>1</sup> | FG       | FCO    | Sig. F | 2017               | 2018    | 2019    | Sig. F |     |     |     |       |
| Glycerolipids                          | 0.26          | 0.26   | ns                  | 0.25     | 0.26   | ns     | 0.27               | 0.24    | 0.26    | ns     | ns  | ns  | ns  | ns    |
| 1-Linoleoyl-rac-glycerol               | 0.23          | 0.23   | ns                  | 0.22     | 0.23   | ns     | 0.23               | 0.21    | 0.24    | ns     | ns  | ns  | ns  | ns    |
| 1-Oleoyl-rac-glycerol                  | 0.02          | 0.02   | ns                  | 0.02     | 0.02   | ns     | 0.02a <sup>2</sup> | 0.02b   | 0.02a   | **     | ns  | ns  | ns  | ns    |
| 1-Monopalmitoleoyl-rac-glycerol        | 0.01          | 0.01   | ns                  | 0.01     | 0.01   | ns     | 0.01               | 0.01    | 0.01    | ns     | ns  | ns  | ns  | ns    |
| Sterols                                | 0.30          | 0.30   | ns                  | 0.29     | 0.31   | ns     | 0.32a              | 0.27b   | 0.31a   | *      | ns  | ns  | ns  | ns    |
| Ergosterol                             | 0.28          | 0.27   | ns                  | 0.27     | 0.28   | ns     | 0.29a              | 0.25b   | 0.29a   | *      | ns  | ns  | ns  | ns    |
| Desmosterol                            | 0.03          | 0.03   | ns                  | 0.03     | 0.03   | ns     | 0.03a              | 0.02b   | 0.03a   | *      | ns  | ns  | ns  | ns    |
| Fatty acids UFA                        | 4.66          | 4.71   | ns                  | 4.67     | 4.71   | ns     | 6.26a              | 3.83b   | 3.98b   | ***    | ns  | ns  | ns  | ns    |
| Linoleic acid                          | 0.28          | 0.27   | ns                  | 0.27     | 0.28   | ns     | 0.36a              | 0.23b   | 0.24b   | ***    | ns  | ns  | ns  | ns    |
| Linolenic acid                         | 0.03          | 0.03   | ns                  | 0.03a    | 0.03b  | *      | 0.03a              | 0.03b   | 0.03ab  | **     | ns  | ns  | ns  | ns    |
| Palmitoleic acid                       | 0.14          | 0.16   | ns                  | 0.15     | 0.16   | ns     | 0.23a              | 0.11b   | 0.11b   | ***    | ns  | ns  | ns  | ns    |
| Oleic acid + <i>cis</i> -Vaccenic acid | 4.21          | 4.25   | ns                  | 4.22     | 4.24   | ns     | 5.64a              | 3.46b   | 3.59b   | ***    | ns  | ns  | ns  | ns    |
| Fatty acids SFA                        | 154.72        | 152.89 | ns                  | 152.80   | 154.81 | ns     | 179.54a            | 142.44b | 139.44b | ***    | ns  | ns  | ns  | ns    |
| Behenic acid                           | 0.65          | 0.64   | ns                  | 0.64     | 0.64   | ns     | 0.73a              | 0.60b   | 0.60b   | ***    | ns  | ns  | *   | ns    |
| Stearic acid                           | 45.70         | 45.97  | ns                  | 45.38    | 46.30  | ns     | 54.75a             | 42.66b  | 40.10b  | ***    | ns  | ns  | ns  | ns    |
| Lignoceric acid                        | 0.34          | 0.34   | ns                  | 0.34     | 0.34   | ns     | 0.37a              | 0.34ab  | 0.31b   | *      | ns  | ns  | ns  | ns    |
| Arachidic acid                         | 2.24          | 2.26   | ns                  | 2.22     | 2.28   | ns     | 2.76a              | 1.95b   | 2.03b   | ***    | ns  | ns  | ns  | ns    |
| Myristic acid                          | 1.55          | 1.60   | ns                  | 1.49b    | 1.66a  | **     | 1.60b              | 1.33c   | 1.79a   | ***    | ns  | ns  | *   | ns    |
| Palmitic acid                          | 103.31        | 101.18 | ns                  | 101.84   | 102.66 | ns     | 118.31a            | 94.73b  | 93.70b  | ***    | ns  | ns  | ns  | ns    |
| Miristoleic acid                       | 0.47          | 0.47   | ns                  | 0.46     | 0.48   | ns     | 0.49a              | 0.42b   | 0.49a   | *      | ns  | ns  | ns  | ns    |
| Margaric acid                          | 0.45          | 0.44   | ns                  | 0.44     | 0.45   | ns     | 0.53a              | 0.40b   | 0.41b   | ***    | ns  | ns  | ns  | ns    |
| Prenols                                | 0.15          | 0.09   | ns                  | 0.09     | 0.14   | ns     | 0.11               | 0.13    | 0.11    | ns     | ns  | ns  | ns  | ns    |
| Lupeol                                 | 0.15          | 0.09   | ns                  | 0.09     | 0.14   | ns     | 0.11               | 0.13    | 0.11    | ns     | ns  | ns  | ns  | ns    |



---

<sup>1</sup> Data were analyzed by three-ways ANOVA (ns, not significant; \*,  $p < 0.05$ ; \*\*,  $p < 0.01$ ; \*\*\*,  $p < 0.001$ ), and when differences were significant, the means were separated using Student Newman Keuls test ( $p < 0.05$ ). <sup>2</sup> Different letters (a, b, c) identify significantly different means. UNT, untreated control; CT, cluster thinning; FG, Friuli Grave; FCO, Friuli Colli Orientali. All the concentrations are expressed in mg/L.



**Table S4.** Impact of cluster thinning, vineyard site and harvest season on the lipid profile of Ribolla Gialla sparkling wines.

| Compound                               | Treatment (T) |        |                     | Site (S) |        |        | Year (Y)           |         |         |        | Y×T | S×T | Y×S | Y×S×T |
|----------------------------------------|---------------|--------|---------------------|----------|--------|--------|--------------------|---------|---------|--------|-----|-----|-----|-------|
|                                        | UNT           | CT     | Sig. F <sup>1</sup> | FG       | FCO    | Sig. F | 2017               | 2018    | 2019    | Sig. F |     |     |     |       |
| Glycerolipids                          | 0.27          | 0.27   | ns                  | 0.27     | 0.27   | ns     | 0.23b <sup>2</sup> | 0.24b   | 0.33a   | ***    | ns  | *   | ns  | ns    |
| 1-Linoleoyl-rac-glycerol               | 0.23          | 0.23   | ns                  | 0.23     | 0.23   | ns     | 0.20b              | 0.21b   | 0.28a   | ***    | ns  | ns  | ns  | ns    |
| 1-Oleoyl-rac-glycerol                  | 0.03          | 0.03   | ns                  | 0.03     | 0.03   | ns     | 0.03ab             | 0.02b   | 0.04a   | *      | ns  | ns  | ns  | ns    |
| 1-Monopalmitoleoyl-rac-glycerol        | 7.23          | 8.47   | ns                  | 6.35     | 9.35   | ns     | 4.76b              | 5.62b   | 13.16a  | *      | ns  | ns  | ns  | ns    |
| Sterols                                | 0.33          | 0.33   | ns                  | 0.34     | 0.32   | ns     | 0.29b              | 0.27c   | 0.44a   | ***    | *   | *   | ns  | ns    |
| Ergosterol                             | 0.30          | 0.30   | ns                  | 0.31a    | 0.29b  | *      | 0.26b              | 0.24c   | 0.40a   | ***    | ns  | *   | ns  | ns    |
| Desmosterol                            | 0.03          | 0.03   | ns                  | 0.03     | 0.03   | ns     | 0.03b              | 0.02b   | 0.04a   | ***    | ns  | ns  | ns  | ns    |
| Fatty acids UFA                        | 6.02          | 5.81   | ns                  | 5.84     | 5.99   | ns     | 6.07a              | 5.45b   | 6.22a   | ***    | ns  | *   | ns  | ns    |
| Linoleic acid                          | 0.32          | 0.33   | ns                  | 0.33     | 0.33   | ns     | 0.29b              | 0.31b   | 0.37a   | ***    | ns  | ns  | ns  | ns    |
| Linolenic acid                         | 0.03          | 0.03   | ns                  | 0.03     | 0.03   | ns     | 0.03b              | 0.03b   | 0.04a   | ***    | ns  | ns  | ns  | ns    |
| Palmitoleic acid                       | 0.41a         | 0.31b  | **                  | 0.33b    | 0.40a  | *      | 0.55a              | 0.33b   | 0.21c   | ***    | ns  | ns  | *   | *     |
| Oleic acid + <i>cis</i> -Vaccenic acid | 5.25          | 5.14   | ns                  | 5.16     | 5.23   | ns     | 5.20b              | 4.79c   | 5.60a   | ***    | ns  | *   | **  | ns    |
| Fatty acids SFA                        | 205.53        | 198.55 | ns                  | 203.76   | 200.32 | ns     | 202.31b            | 184.40c | 219.42a | ***    | ns  | ns  | ns  | ns    |
| Behenic acid                           | 0.81          | 0.81   | ns                  | 0.81     | 0.80   | ns     | 0.76b              | 0.71b   | 0.96a   | ***    | ns  | ns  | ns  | ns    |
| Stearic acid                           | 62.61         | 60.38  | ns                  | 61.88    | 61.11  | ns     | 60.79b             | 56.35c  | 67.35a  | ***    | ns  | ns  | ns  | ns    |
| Lignoceric acid                        | 0.46          | 0.44   | ns                  | 0.45     | 0.45   | ns     | 0.49a              | 0.42b   | 0.45b   | ***    | ns  | ns  | ns  | ns    |
| Arachidic acid                         | 2.81          | 2.80   | ns                  | 2.85     | 2.77   | ns     | 2.68b              | 2.50c   | 3.24a   | ***    | ns  | ns  | ns  | ns    |
| Myristic acid                          | 1.84          | 1.81   | ns                  | 1.81     | 1.84   | ns     | 1.76b              | 1.68b   | 2.04a   | ***    | ns  | ns  | ns  | ns    |
| Palmitic acid                          | 135.95        | 131.28 | ns                  | 134.92   | 132.31 | ns     | 134.88b            | 121.84c | 144.12a | ***    | ns  | ns  | ns  | ns    |
| Miristoleic acid                       | 0.49          | 0.50   | ns                  | 0.51     | 0.49   | ns     | 0.41b              | 0.41b   | 0.68a   | ***    | ns  | ns  | ns  | ns    |
| Margaric acid                          | 0.56          | 0.53   | ns                  | 0.54     | 0.56   | ns     | 0.55b              | 0.50c   | 0.60a   | ***    | ns  | ns  | ns  | ns    |
| Fatty esters                           | 16.29         | 9.70   | ns                  | 9.45     | 16.54  | ns     | 24.22a             | 9.98b   | 4.79c   | *      | ns  | ns  | ns  | ns    |
| Ethyl stearate                         | 16.29         | 9.70   | ns                  | 9.45     | 16.54  | ns     | 24.22a             | 9.98b   | 4.79c   | *      | ns  | ns  | ns  | ns    |

(Continues on the next page)



**Table S4.** (Continued).

| Compound | Treatment (T) |      |                     | Site (S) |      |        | Year (Y) |       |       |        | Y×T | S×T | Y×S | Y×S×T |
|----------|---------------|------|---------------------|----------|------|--------|----------|-------|-------|--------|-----|-----|-----|-------|
|          | UNT           | CT   | Sig. F <sup>1</sup> | FG       | FCO  | Sig. F | 2017     | 2018  | 2019  | Sig. F |     |     |     |       |
| Prenols  | 0.14          | 0.11 | ns                  | 0.14     | 0.11 | ns     | 0.11ab   | 0.07b | 0.18a | *      | ns  | ns  | ns  | ns    |
| Lupeol   | 0.14          | 0.11 | ns                  | 0.14     | 0.11 | ns     | 0.11ab   | 0.07b | 0.18a | *      | ns  | ns  | ns  | ns    |

<sup>1</sup> Data were analyzed by three-ways ANOVA (ns, not significant; \*,  $p < 0.05$ ; \*\*,  $p < 0.01$ ; \*\*\*,  $p < 0.001$ ), and when differences were significant, the means were separated using Student Newman Keuls test ( $p < 0.05$ ). <sup>2</sup> Different letters (a, b, c) identify significantly different means. UNT, untreated control; CT, cluster thinning; FG, Friuli Grave; FCO, Friuli Colli Orientali. All the concentrations are expressed in mg/L except 1-monopalmitoleoyl-rac-glycerol, fatty esters, and ethyl stearate that are reported in µg/L.



**Table S5.** Impact of cluster thinning, vineyard site and harvest season on the aromatic amino acid metabolites profile of Ribolla Gialla base wines.

| Compound <sup>3</sup> | Treatment (T) |       |                     | Site (S)           |        |        | Year (Y) |       |        |        | Y×S | Y×T | S×T | Y×S×T |
|-----------------------|---------------|-------|---------------------|--------------------|--------|--------|----------|-------|--------|--------|-----|-----|-----|-------|
|                       | UNT           | CT    | Sig. F <sup>1</sup> | FG                 | FCO    | Sig. F | 2017     | 2018  | 2019   | Sig. F |     |     |     |       |
| TYR                   | 3.06          | 3.15  | ns                  | 2.51b <sup>2</sup> | 3.70a  | **     | 4.15a    | 2.36b | 2.89b  | ***    | *** | ns  | ns  | ns    |
| PHE                   | 0.99          | 0.89  | ns                  | 0.46b              | 1.42a  | ***    | 2.00a    | 0.35b | 0.45b  | ***    | *** | ns  | ns  | ns    |
| TRP                   | 0.26          | 0.30  | ns                  | 0.27               | 0.29   | ns     | 0.20     | 0.36  | 0.29   | ns     | ns  | ns  | *   | *     |
| KYNA                  | 6.09          | 8.24  | ns                  | 4.96b              | 9.38a  | **     | 9.66a    | 1.50b | 10.79a | ***    | *   | ns  | ns  | ns    |
| NIC                   | 0.39          | 0.25  | ns                  | 0.32               | 0.32   | ns     | 0.28     | 0.26  | 0.41   | ns     | *   | ns  | ns  | ns    |
| TRP-EE                | 0.27          | 0.33  | ns                  | 0.30               | 0.30   | ns     | 0.23b    | 0.39a | 0.27b  | ***    | *   | *   | ns  | ***   |
| TYR-EE                | 6.50          | 5.50  | ns                  | 6.62               | 5.38   | ns     | 10.91a   | 2.85b | 4.51b  | ***    | ns  | ns  | ns  | ns    |
| N-TYR-EE              | 0.28b         | 0.43a | **                  | 0.36               | 0.34   | ns     | 0.41a    | 0.26b | 0.39a  | *      | **  | ns  | ns  | ns    |
| TYL                   | 14.08         | 14.08 | ns                  | 15.26a             | 12.90b | **     | 15.26    | 13.10 | 14.02  | ns     | **  | ns  | ns  | ns    |
| OH-TYL                | 0.34          | 0.38  | ns                  | 0.38               | 0.34   | ns     | 0.36b    | 0.27c | 0.45a  | ***    | **  | ns  | ns  | ***   |
| Ph-AA                 | 0.28          | 0.24  | ns                  | 0.26               | 0.26   | ns     | 0.28     | 0.20  | 0.29   | ns     | ns  | ns  | ns  | ns    |
| TOL                   | 0.35          | 0.39  | ns                  | 0.40               | 0.33   | ns     | 0.27b    | 0.39a | 0.46a  | **     | **  | ns  | ns  | ns    |
| IAA                   | 0.49          | 0.41  | ns                  | 0.36b              | 0.54a  | *      | 0.60a    | 0.34b | 0.43b  | *      | ns  | ns  | ns  | ns    |
| ILA                   | 0.39          | 0.34  | ns                  | 0.40               | 0.32   | ns     | 0.47     | 0.30  | 0.30   | ns     | ns  | ns  | ns  | ns    |
| ILA-GLU <sup>4</sup>  | 0.99b         | 1.21a | **                  | 1.21a              | 0.99b  | **     | 0.74c    | 1.14b | 1.38a  | ***    | *** | ns  | **  | ***   |
| N-SER                 | 0.50a         | 0.42b | **                  | 0.48               | 0.44   | ns     | 0.42     | 0.48  | 0.46   | ns     | ns  | ns  | ns  | *     |
| Ph-LA                 | 0.64          | 0.69  | ns                  | 0.72a              | 0.62b  | **     | 0.54b    | 0.71a | 0.76a  | ***    | *** | ns  | *   | ns    |
| TOL-SO <sub>3</sub> H | 0.42          | 0.37  | ns                  | 0.42               | 0.38   | ns     | 0.72a    | 0.27b | 0.20b  | ***    | ns  | ns  | ns  | ns    |
| ABA                   | 0.39          | 0.42  | ns                  | 0.44a              | 0.37b  | *      | 0.56a    | 0.31b | 0.34b  | ***    | *** | ns  | ns  | ns    |
| ABA-GLU               | 0.40          | 0.39  | ns                  | 0.33               | 0.46   | ns     | 0.41     | 0.34  | 0.43   | ns     | *   | ns  | *   | ns    |

<sup>1</sup> Data were analyzed by three-ways ANOVA (ns, not significant; \*,  $p < 0.05$ ; \*\*,  $p < 0.01$ ; \*\*\*,  $p < 0.001$ ), and when differences were significant, the means were separated using Student Newman Keuls test ( $p < 0.05$ ). <sup>2</sup> Different letters (a, b, c) identify significantly different means. UNT, untreated control; CT, cluster thinning; FG, Friuli Grave; FCO, Friuli Colli Orientali. <sup>3</sup> (TYR) Tyrosine; (PHE) Phenylalanine; (TRP) Tryptophan; (KYNA) Kynurenic acid; (NIC) Nicotinamide; (TRP-EE) Tryptophan ethyl ester; (TYR-EE) Tyrosine ethyl ester; (N-TYR-EE) N-acetyl tyrosine ethyl ester; (TYL) Tyrosol; (OH-TYL) Hydroxytyrosol; (Ph-AA) Phenyl acetic acid; (TOL) Tryptophol; (IAA) Indole 3-acetic acid; (ILA) Indole 3-lactic acid; (ILA-GLU) Indole 3-lactic acid glucoside; (N-SER) N-acetyl serotonin; (Ph-LA) Phenyl lactic acid; (TOL-SO<sub>3</sub>H) Tryptophol-2-sulfonic acid; (ABA) Absciscic acid; (ABA-GLU) Absciscic acid glucoside. <sup>4</sup> Quantified as ILA. All the concentrations are expressed in mg/L.



**Table S6.** Impact of cluster thinning, vineyard site and harvest season on the aromatic amino acid metabolites profile of Ribolla Gialla sparkling wines.

| Compound <sup>3</sup> | Treatment (T)      |       |                     | Site (S) |        |        | Year (Y) |       |       |        | Y×S | Y×T | S×T | Y×S×T |
|-----------------------|--------------------|-------|---------------------|----------|--------|--------|----------|-------|-------|--------|-----|-----|-----|-------|
|                       | UNT                | CT    | Sig. F <sup>1</sup> | FG       | FCO    | Sig. F | 2017     | 2018  | 2019  | Sig. F |     |     |     |       |
| TYR                   | 3.62b <sup>2</sup> | 5.26a | **                  | 3.80b    | 5.07a  | *      | 4.50     | 4.59  | 4.23  | ns     | *   | *   | **  | ***   |
| PHE                   | 2.68               | 2.36  | ns                  | 1.48b    | 3.56a  | ***    | 4.32a    | 2.43b | 0.81c | ***    | *** | ns  | ns  | *     |
| TRP                   | 0.34               | 0.28  | ns                  | 0.31     | 0.31   | ns     | 0.35a    | 0.20b | 0.38a | **     | *   | *   | *   | ns    |
| KYNA                  | 7.80               | 8.50  | ns                  | 5.32b    | 10.98a | **     | 12.32a   | 2.34b | 9.78a | ***    | *   | ns  | ns  | ns    |
| NIC                   | 0.48               | 0.39  | ns                  | 0.45     | 0.42   | ns     | 0.46a    | 0.21b | 0.63a | ***    | *   | ns  | ns  | ns    |
| TRP-EE                | 0.40a              | 0.21b | *                   | 0.28     | 0.33   | ns     | 0.24     | 0.40  | 0.29  | ns     | ns  | ns  | ns  | ns    |
| TYR-EE                | 14.99              | 12.41 | ns                  | 9.94b    | 17.47a | ***    | 24.65a   | 6.49b | 9.98b | ***    | **  | ns  | ns  | ns    |
| N-TYR-EE              | 0.29b              | 0.53a | *                   | 0.39     | 0.43   | ns     | 0.40     | 0.32  | 0.52  | ns     | ns  | ns  | ns  | ns    |
| TYL                   | 15.25              | 15.65 | ns                  | 14.59    | 16.31  | ns     | 16.78    | 15.80 | 13.77 | ns     | ns  | ns  | ns  | ns    |
| OH-TYL                | 0.31               | 0.31  | ns                  | 0.24b    | 0.38a  | ***    | 0.31ab   | 0.26b | 0.35a | **     | *** | ns  | ns  | ns    |
| Ph-AA                 | 0.34               | 0.31  | ns                  | 0.34     | 0.31   | ns     | 0.24     | 0.34  | 0.39  | ns     | ns  | ns  | **  | ns    |
| TOL                   | 0.49               | 0.54  | ns                  | 0.51     | 0.51   | ns     | 0.33c    | 0.73a | 0.48b | ***    | ns  | ns  | ns  | ns    |
| IAA                   | 0.43a              | 0.24b | *                   | 0.33     | 0.33   | ns     | 0.44     | 0.21  | 0.35  | ns     | ns  | ns  | ns  | ns    |
| ILA                   | 0.32               | 0.41  | ns                  | 0.31     | 0.42   | ns     | 0.40     | 0.36  | 0.33  | ns     | ns  | ns  | ns  | ns    |
| ILA-GLU <sup>4</sup>  | 1.31               | 1.27  | ns                  | 1.46a    | 1.13b  | **     | 0.95b    | 1.37a | 1.56a | ***    | ns  | ns  | ns  | ns    |
| N-SER                 | 0.44               | 0.42  | ns                  | 0.47     | 0.39   | ns     | 0.46     | 0.42  | 0.41  | ns     | ns  | ns  | ns  | ns    |
| Ph-LA                 | 0.84               | 0.89  | ns                  | 0.86     | 0.88   | ns     | 0.73b    | 1.15a | 0.72b | ***    | **  | *   | ns  | ns    |
| TOL-SO <sub>3</sub> H | 0.60               | 0.53  | ns                  | 0.41b    | 0.72a  | ***    | 1.00a    | 0.44b | 0.26b | ***    | ns  | ns  | ns  | ns    |
| 2AA                   | 0.38               | 0.36  | ns                  | 0.47a    | 0.27b  | **     | 0.33b    | 0.48a | 0.30b | *      | *   | ns  | ns  | ns    |
| ABA                   | 0.51               | 0.59  | ns                  | 0.58     | 0.53   | ns     | 0.83a    | 0.43b | 0.40b | ***    | *** | ns  | ns  | ns    |
| ABA-GLU               | 0.41               | 0.35  | ns                  | 0.38     | 0.39   | ns     | 0.42     | 0.42  | 0.31  | ns     | ns  | ns  | ns  | ns    |

<sup>1</sup> Data were analyzed by three-ways ANOVA (ns, not significant; \*,  $p < 0.05$ ; \*\*,  $p < 0.01$ ; \*\*\*,  $p < 0.001$ ), and when differences were significant, the means were separated using Student Newman Keuls test ( $p < 0.05$ ). <sup>2</sup> Different letters (a, b, c) identify significantly different means. UNT, untreated control; CT, cluster thinning; FG, Friuli Grave; FCO, Friuli Colli Orientali. <sup>3</sup> (TYR) Tyrosine; (PHE) Phenylalanine; (TRP) Tryptophan; (KYNA) Kynurenic acid; (NIC) Nicotinamide; (TRP-EE) Tryptophan ethyl ester; (TYR-EE) Tyrosine ethyl ester; (N-TYR-EE) N-acetyl tyrosine ethyl ester; (TYL) Tyrosol; (OH-TYL) Hydroxytyrosol; (Ph-AA) Phenyl acetic acid; (TOL) Tryptophol; (IAA) Indole 3-acetic acid; (ILA) Indole 3-lactic acid;



---

(ILA GLU) Indole 3-lactic acid glucoside; (N-SER) N-acetyl serotonin; (Ph-LA) Phenyl lactic acid; (TOL-SO<sub>3</sub>H) Tryptophol-2-sulfonic acid; (2AA) 2-Aminoacetophenone; (ABA) Absciscic acid; (ABA-GLU) Absciscic acid glucoside. <sup>4</sup> Quantified as ILA. All the concentrations are expressed in mg/L.



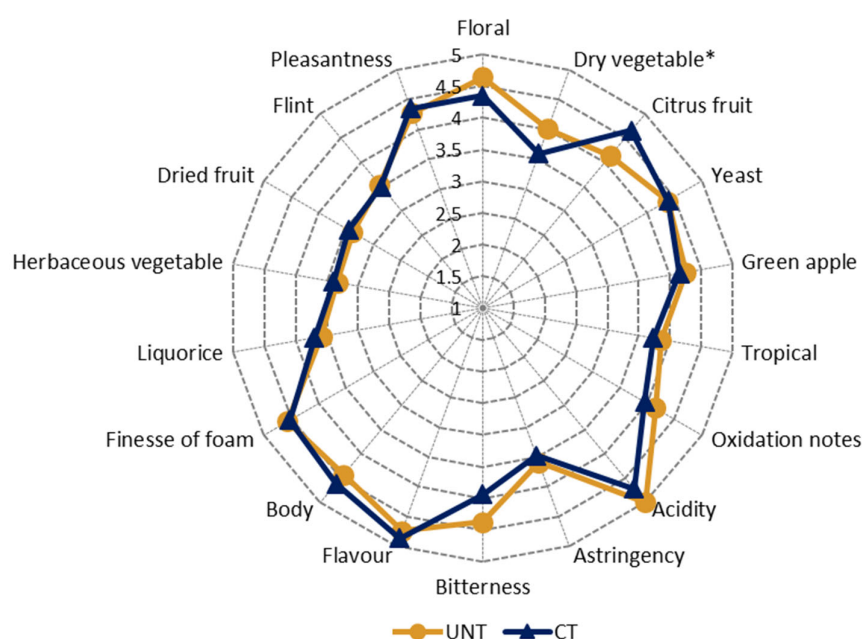

**Figure S2.** Effect of cluster thinning on the organoleptic characteristics of Ribolla Gialla sparkling wines. The average values were obtained from 2017–2019 and FG-FCO vineyard sites. Yellow and blue line represent untreated (UNT) and treated (CT) samples, respectively. Asterisks (\*) indicate statistical significance ( $p < 0.05$ ) for each sensory attribute.

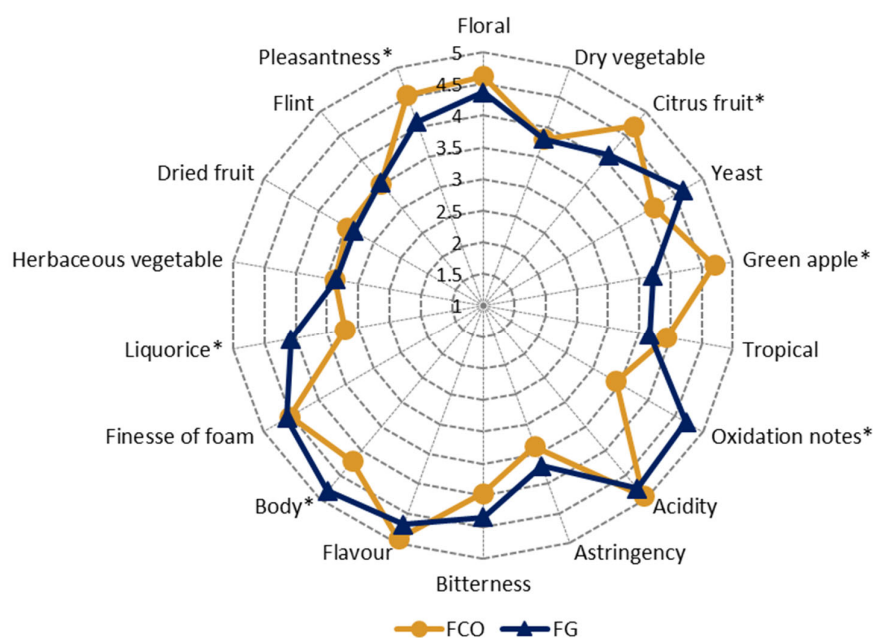

**Figure S3.** Effect of production site on the organoleptic characteristics of Ribolla Gialla sparkling wines. The average values were obtained from 2017–2019 of both UNT and CT samples. Yellow and blue line represent Friuli Colli Orientali (FCO) and Friuli Grave (FG) samples, respectively. Asterisks (\*) indicate statistical significance ( $p < 0.05$ ) for each sensory attribute.



**Table S7.** Retention indices and identification method used for VOCs analysis in base wines and sparkling wines.

| Compound                  | RT (min) | RI <sub>exp</sub> | RI <sub>lit</sub> | IM        | Literature |
|---------------------------|----------|-------------------|-------------------|-----------|------------|
| Monoterpenes              |          |                   |                   |           |            |
| β-Myrcene                 | 8.59     | 1159              | 1173              | MS RI STD | [62]       |
| Limonene                  | 9.32     | 1187              | 1204              | MS RI STD | [59]       |
| Linalool                  | 17.60    | 1546              | 1555              | MS RI STD | [60]       |
| Geraniol                  | 23.28    | 1876              | 1850              | MS RI STD | [61]       |
| Citronellol               | 21.81    | 1766              | 1777              | MS RI STD | [62]       |
| Nerol                     | 21.73    | 1761              | 1777              | MS RI STD | [63]       |
| Terpinen-4-ol             | 18.69    | 1600              | 1618              | MS RI STD | [64]       |
| α-Terpineol               | 20.54    | 1696              | 1679              | MS RI STD | [65]       |
| Norisoprenoids            |          |                   |                   |           |            |
| Vitispirane               | 17.15    | 1524              | 1505              | MS RI     | [86]       |
| TDN                       | 21.44    | 1745              | 1732              | MS RI     | [60]       |
| β-Damascenone             | 22.81    | 1833              | 1857              | MS RI STD | [66]       |
| Actinidiol (isomer 1)     | 24.65    | 2005              | -                 | MS        | -          |
| Actinidiol (isomer 2)     | 24.88    | 2018              | -                 | MS        | -          |
| Aldehydes                 |          |                   |                   |           |            |
| Hexanal                   | 6.55     | 1081              | 1072              | MS RI STD | [67]       |
| trans-2-Hexenal           | 10.73    | 1242              | 1235              | MS RI STD | [68]       |
| Nonanal                   | 14.32    | 1392              | 1397              | MS RI     | [69]       |
| Benzaldehyde              | 17.08    | 1520              | 1507              | MS RI STD | [70]       |
| 3,4-Dimethyl benzaldehyde | 22.23    | 1789              | 1790              | MS RI     | [71]       |
| Acetaldehyde              | 1.72     | 549               | -                 | MS        | -          |
| Furfural                  | 15.86    | 1463              | 1460              | MS RI     | [72]       |
| Alcohols                  |          |                   |                   |           |            |
| n-Hexanol                 | 13.40    | 1353              | 1358              | MS RI STD | [70]       |
| trans-3-Hexenol           | 13.63    | 1363              | 1374              | MS RI STD | [65]       |
| 1-Octanol                 | 17.81    | 1556              | 1562              | MS RI     | [70]       |
| Iso-butanol               | 7.14     | 1104              | 1114              | MS RI STD | [73]       |
| Methionol                 | 20.88    | 1715              | 1711              | MS RI     | [74]       |
| Isoamyl alcohol           | 10.11    | 1218              | 1209              | MS RI STD | [75]       |
| 3-Methyl-1-pentanol       | 12.76    | 1325              | 1316              | MS RI STD | [74]       |
| 2,3-Butanediol (isomer 1) | 17.41    | 1537              | 1529              | MS RI     | [76]       |
| 2,3-Butanediol (isomer 2) | 18.16    | 1574              | 1583              | MS RI     | [75]       |
| cis-3-Hexenol             | 14.57    | 1403              | 1382              | MS RI STD | [76]       |
| trans-2-Hexenol           | 15.06    | 1426              | 1420              | MS RI STD | [73]       |
| 2-Phenylethanol           | 24.08    | 1906              | 1923              | MS RI     | [80]       |

(Continues on the next page).



Table S7. (Continued).

| Compound                      | RT (min) | RI <sub>exp</sub> | RI <sub>lit</sub> | IM        | Literature |
|-------------------------------|----------|-------------------|-------------------|-----------|------------|
| Esters                        |          |                   |                   |           |            |
| Ethyl acetate                 | 2.69     | 892               | 889               | MS RI     | [77]       |
| Ethyl butyrate                | 5.52     | 1040              | 1025              | MS RI STD | [58]       |
| Isopentyl acetate             | 7.60     | 1122              | 1120              | MS RI STD | [59]       |
| Hexyl acetate                 | 11.46    | 1272              | 1295              | MS RI STD | [60]       |
| Methyl caproate               | 9.28     | 1185              | 1180              | MS RI STD | [61]       |
| Ethyl hexanoate               | 10.53    | 1234              | 1241              | MS RI STD | [62]       |
| Ethyl lactate                 | 13.18    | 1343              | 1355              | MS RI     | [63]       |
| Methyl octanoate              | 14.26    | 1390              | 1387              | MS RI     | [64]       |
| Ethyl octanoate               | 15.24    | 1434              | 1453              | MS RI STD | [65]       |
| Isoamyl lactate               | 18.04    | 1568              | 1570              | MS RI     | [81]       |
| Methyl decanoate              | 18.60    | 1596              | 1604              | MS RI     | [82]       |
| Ethyl decanoate               | 19.48    | 1641              | 1643              | MS RI STD | [60]       |
| Isoamyl octanoate             | 19.85    | 1660              | 1654              | MS RI STD | [66]       |
| Methyl ethyl succinate        | 19.36    | 1635              | 1641              | MS RI     | [83]       |
| Diethyl succinate             | 20.16    | 1677              | 1679              | MS RI     | [83]       |
| Ethyl 9-decanoate             | 20.46    | 1692              | 1708              | MS RI     | [84]       |
| Ethyl-2-OH-4-methylpentanoate | 17.51    | 1542              | 1547              | MS RI     | [67]       |
| 2-Phenylethyl acetate         | 22.72    | 1825              | 1832              | MS RI STD | [68]       |
| Ethyl hydrogen succinate      | 31.69    | -                 | -                 | MS        | -          |
| Methyl salicylate             | 21.99    | 1775              | 1765              | MS RI STD | [70]       |
| Ethyl hydroxybutanoate        | 22.51    | 1806              | -                 | MS        | -          |
| Ethyl dodecanoate             | 22.80    | 1832              | 1850              | MS RI     | [85]       |
| Isobutyl acetate              | 5.42     | 1036              | 1020              | MS RI STD | [72]       |
| Acids                         |          |                   |                   |           |            |
| Acetic acid                   | 15.66    | 1453              | 1437              | MS RI STD | [70]       |
| Butyric acid                  | 19.26    | 1630              | 1598              | MS RI STD | [72]       |
| 3-Methylbutyric acid          | 20.05    | 1671              | 1657              | MS RI     | [70]       |
| Hexanoic acid                 | 23.28    | 1876              | 1857              | MS RI STD | [62]       |
| Octanoic acid                 | 26.86    | -                 | -                 | MS STD    | -          |
| Nonanoic acid                 | 28.54    | -                 | -                 | MS STD    | -          |
| Decanoic acid                 | 30.13    | -                 | -                 | MS STD    | -          |
| Benzoic acid                  | 32.47    | -                 | -                 | MS        | -          |
| Dodecanoic acid               | 33.17    | -                 | -                 | MS        | -          |
| Ketones                       |          |                   |                   |           |            |
| 2-Methylthiolan-3-one         | 17.16    | 1524              | 1510              | MS RI     | [78]       |
| Isophorone                    | 18.00    | 1566              | 1600              | MS RI     | [79]       |

RT, retention time in min; RI<sub>exp</sub>, experimentally determined retention index; RI<sub>lit</sub>, retention index reported in the literature; IM, identification method (MS, comparison of mass spectra with those reported in mass spectrum libraries; RI, comparison of order of elution with those reported in literature; STD, comparison of mass spectra and retention time with those of standard compounds).
